# Supplementary material for: Citalopram amplifies the influence of living conditions on mood in depressed patients enrolled in the STAR*D study
Source: PubMed Central journal article supplement (PMC5416678; doi:10.1038/tp.2017.35), 2017-03-21
Supplement: tp201735x1.pdf [file tp201735x1.pdf]

**Citalopram amplifies the influence of living conditions on mood in a dose-dependent manner in depressed patients enrolled in the STAR\*D study**

Flavia Chiarotti, Aurelia Viglione, Alessandro Giuliani, and Igor Branchi

SUPPLEMENTARY DATA

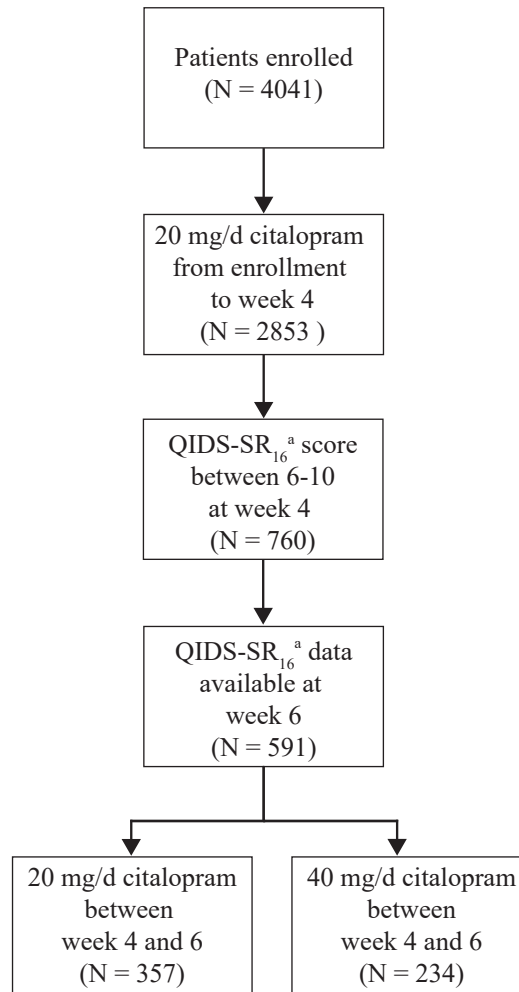

<sup>a</sup> QIDS-SR<sub>16</sub> = Quick Inventory of Depressive Symptomatology-Self-Report

**Figure S1: Criteria used to select patients participating to the STAR\*D study which constitute the evaluable sample analyzed in the present study**

**TABLE S1. QIDS-SR16 values at enrollment and week 4 in the 20 and 40 mg/d dose groups**

|                    | <b>20mg/d</b> | <b>40mg/d</b> |
|--------------------|---------------|---------------|
| <b>Enrollment</b>  |               |               |
| Minimum            | 3             | 5             |
| 1st Quartile       | 11            | 12            |
| Median             | 14            | 15            |
| Mean               | 14.14         | 14.7          |
| 3rd Quartile       | 17            | 17            |
| Maximum            | 23            | 26            |
| Standard deviation | 3.78          | 3.79          |
| <b>Week 4</b>      |               |               |
| Minimum            | 6             | 6             |
| 1st Quartile       | 7             | 7             |
| Median             | 8             | 8             |
| Mean               | 7.93          | 8.16          |
| 3rd Quartile       | 9             | 9             |
| Maximum            | 10            | 10            |
| Standard deviation | 1.39          | 1.44          |

**TABLE S2. Baseline sociodemographic characteristics associated with improvement by citalopram dose<sup>a</sup> - Relative Risk**

| Characteristics                    | 20 mg/die        |          | RR <sup>b</sup> | 95%CI |       | 40 mg/die       |          | RR <sup>b</sup> | 95%CI       |             |
|------------------------------------|------------------|----------|-----------------|-------|-------|-----------------|----------|-----------------|-------------|-------------|
|                                    | N = 357 ( 60.4%) |          |                 |       |       | N = 234 (39.6%) |          |                 |             |             |
|                                    | IMPROVED         | NOT IMPR |                 | Lower | Upper | IMPROVED        | NOT IMPR |                 | Lower       | Upper       |
|                                    | n                | n        |                 |       |       | n               | n        |                 |             |             |
| <b>Overall</b>                     | 203              | 154      |                 |       |       | 128             | 106      |                 |             |             |
| <b>Ethnicity</b>                   |                  |          |                 |       |       |                 |          |                 |             |             |
| Non-Caucasian <sup>c</sup>         | 59               | 49       | 0.94            | 0.77  | 1.16  | 26              | 31       | 0.79            | 0.58        | 1.08        |
| Caucasian                          | 144              | 105      |                 |       |       | 102             | 75       |                 |             |             |
| <b>Sex</b>                         |                  |          |                 |       |       |                 |          |                 |             |             |
| Female                             | 130              | 92       | 1.08            | 0.89  | 1.31  | 81              | 59       | 1.16            | 0.90        | 1.48        |
| Male                               | 73               | 62       |                 |       |       | 47              | 47       |                 |             |             |
| <b>Marital status</b>              |                  |          |                 |       |       |                 |          |                 |             |             |
| No more married                    | 55               | 22       | 1.19            | 0.98  | 1.46  | 26              | 22       | 0.91            | 0.66        | 1.24        |
| Never married                      | 49               | 37       | 0.95            | 0.76  | 1.20  | 32              | 22       | 0.99            | 0.75        | 1.31        |
| Married                            | 79               | 53       |                 |       |       | 52              | 35       |                 |             |             |
| <b>Employment status</b>           |                  |          |                 |       |       |                 |          |                 |             |             |
| Unemployed & Retired               | 66               | 44       | 0.95            | 0.79  | 1.14  | 36              | 39       | <b>0.74</b>     | <b>0.56</b> | <b>0.97</b> |
| Employed                           | 117              | 68       |                 |       |       | 74              | 40       |                 |             |             |
| <b>Education<sup>d</sup></b>       |                  |          |                 |       |       |                 |          |                 |             |             |
| < College                          | 112              | 68       | 1.01            | 0.84  | 1.21  | 57              | 57       | <b>0.71</b>     | <b>0.56</b> | <b>0.89</b> |
| ≥ College                          | 71               | 44       |                 |       |       | 53              | 22       |                 |             |             |
| <b>Income<sup>e</sup></b>          |                  |          |                 |       |       |                 |          |                 |             |             |
| Lower                              | 57               | 48       | 0.94            | 0.75  | 1.18  | 29              | 38       | <b>0.64</b>     | <b>0.47</b> | <b>0.88</b> |
| Middle                             | 68               | 46       | 1.03            | 0.84  | 1.27  | 41              | 40       | <b>0.75</b>     | <b>0.58</b> | <b>0.98</b> |
| Higher                             | 74               | 54       |                 |       |       | 54              | 26       |                 |             |             |
| <b>Experienced traumatic event</b> |                  |          |                 |       |       |                 |          |                 |             |             |
| No                                 | 118              | 85       | 1.07            | 0.89  | 1.29  | 67              | 63       | 0.86            | 0.68        | 1.09        |
| Yes                                | 82               | 69       |                 |       |       | 61              | 41       |                 |             |             |
| <b>Witnessed traumatic event</b>   |                  |          |                 |       |       |                 |          |                 |             |             |
| No                                 | 141              | 100      | 1.12            | 0.91  | 1.38  | 85              | 79       | 0.82            | 0.65        | 1.04        |
| Yes                                | 59               | 54       |                 |       |       | 43              | 25       |                 |             |             |
| <b>Drug abuse</b>                  |                  |          |                 |       |       |                 |          |                 |             |             |
| No                                 | 38               | 35       | 1.04            | 0.26  | 4.24  | 26              | 30       | 0.62            | 0.33        | 1.16        |
| Yes                                | 1                | 1        |                 |       |       | 3               | 1        |                 |             |             |
| <b>Insurance status</b>            |                  |          |                 |       |       |                 |          |                 |             |             |
| No insurance                       | 64               | 39       | 1.01            | 0.83  | 1.22  | 41              | 35       | 0.80            | 0.62        | 1.03        |
| Public insurance                   | 17               | 8        | 1.10            | 0.82  | 1.48  | 2               | 12       | <b>0.21</b>     | <b>0.06</b> | <b>0.77</b> |
| Private insurance                  | 101              | 63       |                 |       |       | 66              | 32       |                 |             |             |

**Table S1**

<sup>a</sup>Improvement was measured as a reduction  $\geq 1$  in 16-item Quick Inventory of Depressive Symptomatology-Self-Report (QIDS-SR<sub>16</sub>) score between week 4 and 6

<sup>b</sup>Comparison is with the group listed last under the category or with the opposite characteristic

<sup>c</sup>Asian, American Indian or Alaskan Native, Native Hawaiian/Other Pacific Islander, or multiracial; <sup>d</sup>< College = <16 years of schooling,  $\geq$  College =  $\geq$ 16 years of schooling; <sup>e</sup>Lower = monthly gain  $\leq$  \$1000, Middle = monthly gain \$1000-\$2500, Higher = monthly gain > \$2500

RR, Relative Risk

**TABLE S3. Baseline sociodemographic characteristics associated with remission by citalopram dose<sup>a</sup> - Relative Risk**

| Characteristics                    | 20 mg/die<br>N = 357 ( 60.4%) |        |                 | 40 mg/die<br>N = 234 (39.6%) |       |     | 95%CI  |                 |             |             |
|------------------------------------|-------------------------------|--------|-----------------|------------------------------|-------|-----|--------|-----------------|-------------|-------------|
|                                    | REM                           | NO REM | RR <sup>b</sup> | 95%CI                        |       | REM | NO REM | RR <sup>b</sup> | 95%CI       |             |
|                                    | n                             | n      |                 | Lower                        | Upper | n   | n      |                 | Lower       | Upper       |
| <b>Overall</b>                     | 203                           | 154    |                 |                              |       | 128 | 106    |                 |             |             |
| <b>Ethnicity</b>                   |                               |        |                 |                              |       |     |        |                 |             |             |
| Non-Caucasian <sup>c</sup>         | 38                            | 70     | 0.97            | 0.72                         | 1.32  | 9   | 48     | 0.58            | 0.31        | 1.11        |
| Caucasian                          | 90                            | 159    |                 |                              |       | 48  | 129    |                 |             |             |
| <b>Sex</b>                         |                               |        |                 |                              |       |     |        |                 |             |             |
| Female                             | 82                            | 140    | 1.08            | 0.81                         | 1.45  | 39  | 101    | 1.45            | 0.89        | 2.38        |
| Male                               | 46                            | 89     |                 |                              |       | 18  | 76     |                 |             |             |
| <b>Marital status</b>              |                               |        |                 |                              |       |     |        |                 |             |             |
| No more married                    | 35                            | 42     | 1.22            | 0.88                         | 1.70  | 11  | 37     | 0.87            | 0.46        | 1.62        |
| Never married                      | 29                            | 57     | 0.91            | 0.63                         | 1.32  | 12  | 42     | 0.84            | 0.46        | 1.55        |
| Married                            | 49                            | 83     |                 |                              |       | 23  | 64     |                 |             |             |
| <b>Employment status</b>           |                               |        |                 |                              |       |     |        |                 |             |             |
| Unemployed & Retired               | 40                            | 70     | 0.92            | 0.68                         | 1.25  | 12  | 63     | <b>0.54</b>     | <b>0.30</b> | <b>0.97</b> |
| Employed                           | 73                            | 112    |                 |                              |       | 34  | 80     |                 |             |             |
| <b>Education<sup>d</sup></b>       |                               |        |                 |                              |       |     |        |                 |             |             |
| < College                          | 74                            | 106    | 1.21            | 0.89                         | 1.65  | 22  | 92     | <b>0.60</b>     | <b>0.37</b> | <b>0.99</b> |
| ≥ College                          | 39                            | 76     |                 |                              |       | 24  | 51     |                 |             |             |
| <b>Income<sup>e</sup></b>          |                               |        |                 |                              |       |     |        |                 |             |             |
| Lower                              | 35                            | 70     | 1.02            | 0.70                         | 1.47  | 12  | 55     | 0.57            | 0.31        | 1.05        |
| Middle                             | 49                            | 65     | 1.31            | 0.95                         | 1.81  | 16  | 65     | 0.63            | 0.37        | 1.09        |
| Higher                             | 42                            | 86     |                 |                              |       | 25  | 55     |                 |             |             |
| <b>Experienced traumatic event</b> |                               |        |                 |                              |       |     |        |                 |             |             |
| No                                 | 76                            | 127    | 1.15            | 0.86                         | 1.54  | 30  | 100    | 0.87            | 0.56        | 1.37        |
| Yes                                | 49                            | 102    |                 |                              |       | 27  | 75     |                 |             |             |
| <b>Witnessed traumatic event</b>   |                               |        |                 |                              |       |     |        |                 |             |             |
| No                                 | 89                            | 152    | 1.16            | 0.84                         | 1.59  | 39  | 125    | 0.90            | 0.55        | 1.45        |
| Yes                                | 36                            | 77     |                 |                              |       | 18  | 50     |                 |             |             |
| <b>Drug abuse</b>                  |                               |        |                 |                              |       |     |        |                 |             |             |
| No                                 | 26                            | 47     | 0.71            | 0.17                         | 2.95  | 11  | 45     | 0.39            | 0.13        | 1.20        |
| Yes                                | 1                             | 1      |                 |                              |       | 2   | 2      |                 |             |             |
| <b>Insurance status</b>            |                               |        |                 |                              |       |     |        |                 |             |             |
| No insurance                       | 41                            | 62     | 1.07            | 0.79                         | 1.46  | 14  | 62     | 0.58            | 0.33        | 1.01        |
| Public insurance                   | 10                            | 15     | 1.08            | 0.64                         | 1.81  | 0   | 14     | 0.00            | n.d.        | n.d.        |
| Private insurance                  | 61                            | 103    |                 |                              |       | 31  | 67     |                 |             |             |

**Table S2**

<sup>a</sup>Remission was defined as a score ≤ 5 at week 6 on the 16-item Quick Inventory of Depressive Symptomatology-Self-Report

<sup>b</sup>Comparison is with the group listed last under the category or with the opposite characteristic

<sup>c</sup>Asian, American Indian or Alaskan Native, Native Hawaiian/Other Pacific Islander, or multiracial; <sup>d</sup>< College = <16 years of schooling, ≥ College = ≥16 years of schooling; <sup>e</sup>Lower = monthly gain ≤ \$1000, Middle = monthly gain \$1000-\$2500, Higher = monthly gain > \$2500

RR, Relative Risk; n.d., not determined

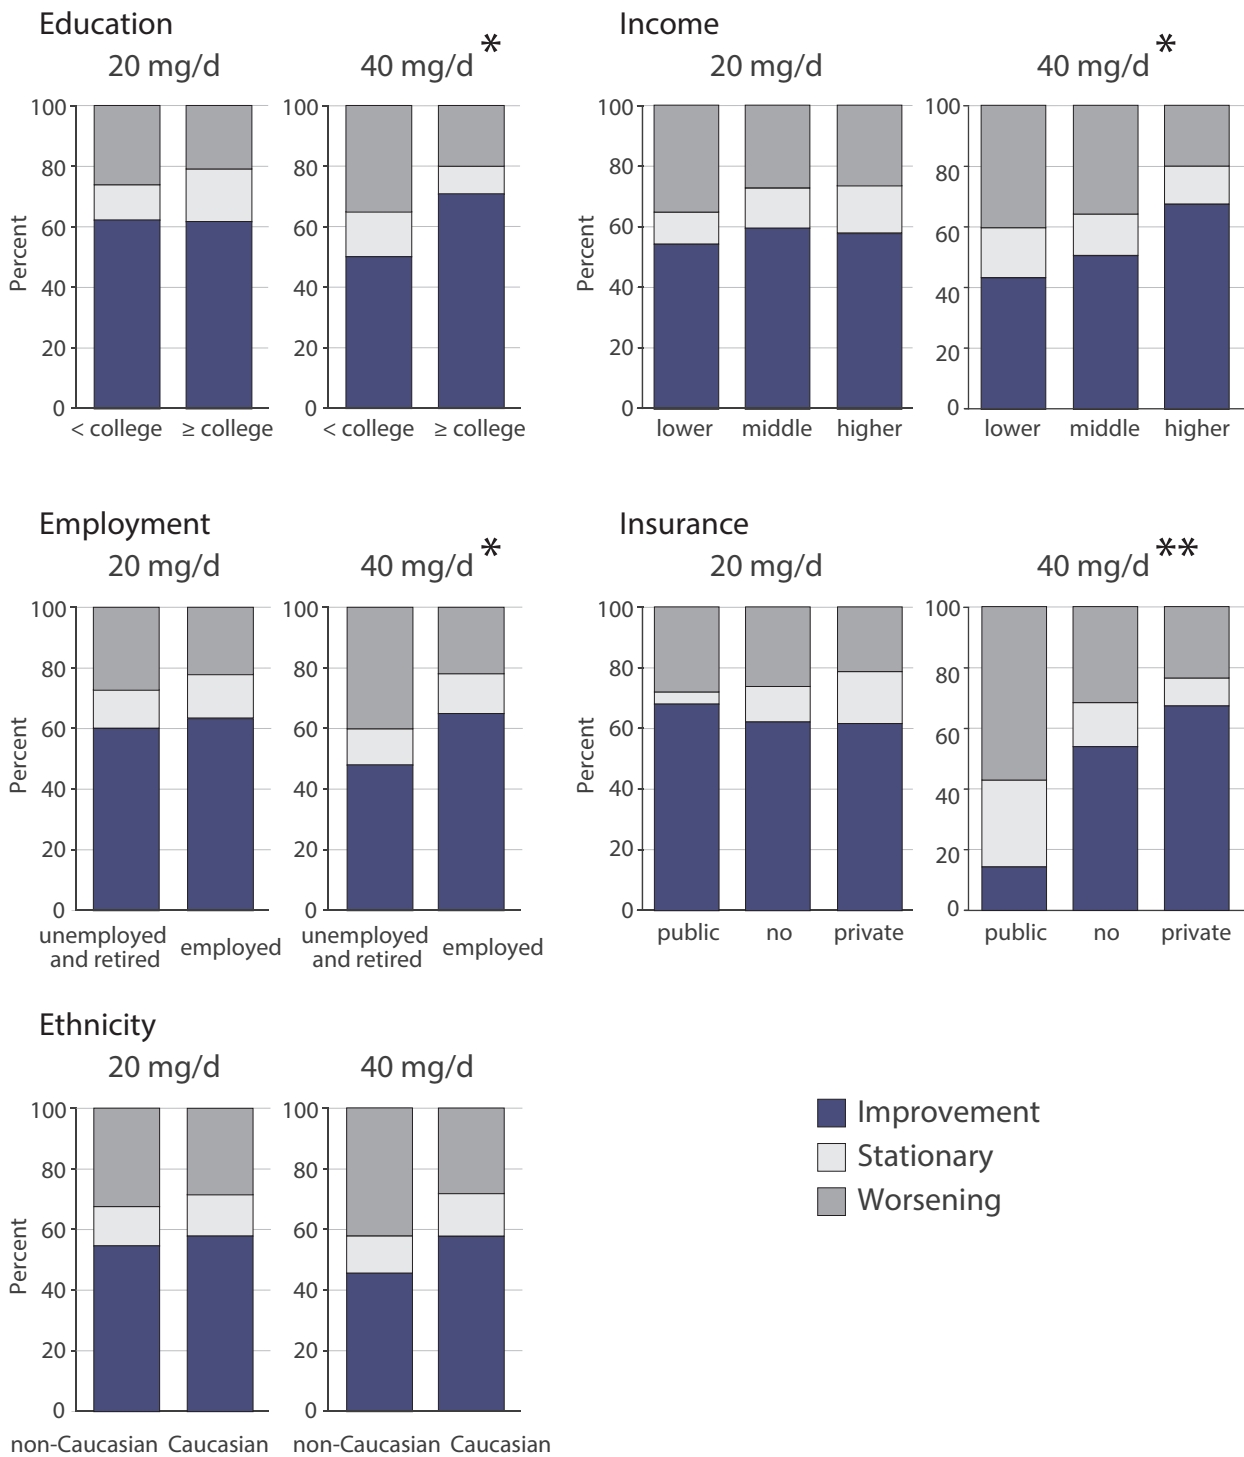

**Figure S2. The 40, compared to 20 mg/d dose, leads to an increase not only of the percent of improvements in patients living in a favorable environment but also of and the percent of worsening in patients living in an unfavorable environment.** Percent of patients showing improvement (i.e., reduction  $\leq 1$  in QIDS-SR16 score), percent of stationary patients (i.e. no change in QIDS-SR16 score) and percent of patients showing a worsening (i.e., increase  $\geq 1$  in QIDS-SR16 score) were measured between week 4 and 6, according to the dose regimen - either 20 or 40 mg/d dose. Only patients receiving the 40 mg/d dose showed a variation in these percent significantly moderated by the sociodemographic characteristics. Chi-square \* $p < 0.05$  and \*\*  $p < 0.01$
